# Supplementary material
Source: PubMed Central journal article supplement (PMC5395121)
Supplement: 2016.154740.LIDONNICI_SUPPL.pdf [file 2016.154740.LIDONNICI_SUPPL.pdf]

**Plerixafor and G-CSF combination mobilizes hematopoietic stem and progenitors cells with a distinct transcriptional profile and a reduced *In vivo* homing capacity compared to plerixafor alone**

Maria Rosa Lidonnici,<sup>1,2\*</sup> Annamaria Aprile,<sup>1,3\*</sup> Marta Claudia Frittoli,<sup>4</sup> Giacomo Mandelli,<sup>4</sup> Ylenia Paleari,<sup>1,2</sup> Antonello Spinelli,<sup>5</sup> Bernhard Gentner,<sup>4</sup> Matilde Zambelli,<sup>6</sup> Cristina Parisi,<sup>6</sup> Laura Bellio,<sup>6</sup> Elena Cassinero,<sup>7</sup> Laura Zanaboni,<sup>7</sup> Maria Domenica Cappellini,<sup>7</sup> Fabio Ciceri,<sup>4</sup> Sarah Marketel<sup>4</sup> and Giuliana Ferrari<sup>1,2</sup>

*\*MRL and AA contributed equally to this work.*

<sup>1</sup>San Raffaele-Telethon Institute for Gene Therapy (SR-TIGET), Division of Regenerative Medicine, Stem Cells and Gene Therapy, IRCCS San Raffaele Scientific Institute, Milan; <sup>2</sup>Vita-Salute San Raffaele University, Milan; <sup>3</sup>Università degli Studi di Roma "Tor Vergata"; <sup>4</sup>Hematology and Bone Marrow Transplantation Unit, IRCCS San Raffaele Scientific Institute, Milan; <sup>5</sup>Experimental Imaging Centre, San Raffaele Scientific Institute, Milan; <sup>6</sup>Immunohematology and Transfusion Medicine Unit, IRCCS San Raffaele Scientific Institute, Milan and <sup>7</sup>Università di Milano, Ca Granda Foundation IRCCS, Italy

Correspondence: ferrari.giuliana@hsr.it  
doi:10.3324/haematol.2016.154740

## SUPPLEMENTARY FIGURES

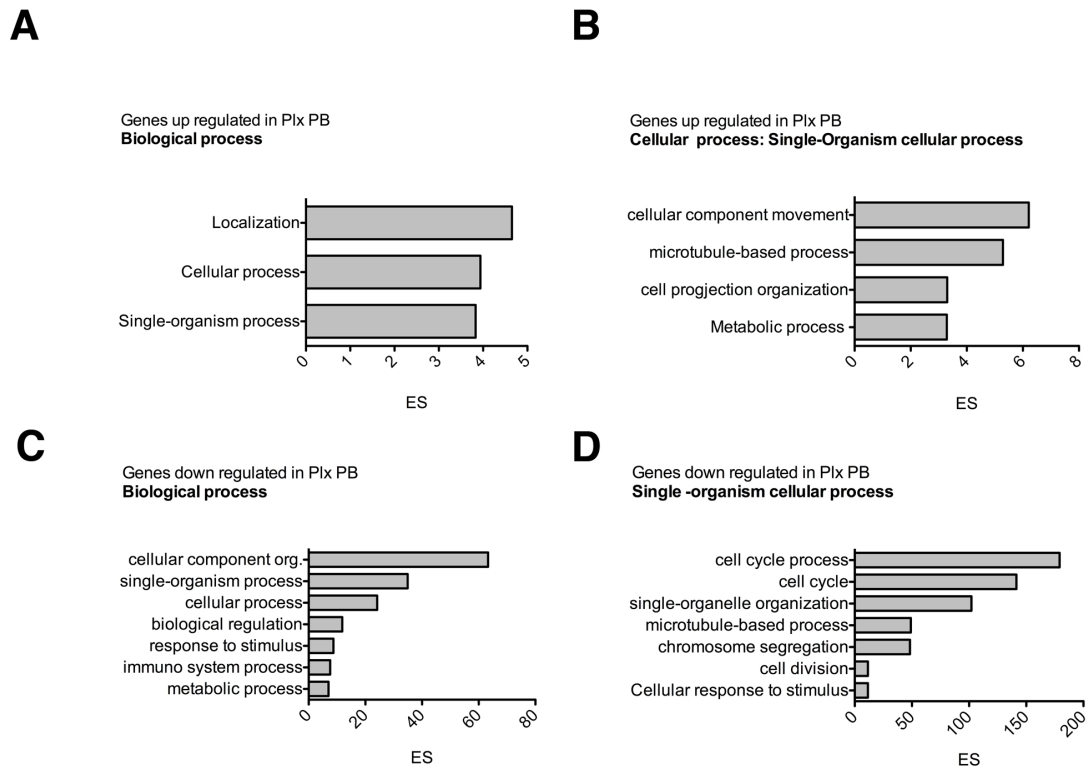

**Fig. S1. Gene Ontology analysis of differentially expressed genes in Plx PB.**

Functional annotation by Partek software showed that genes could be grouped into a limited number of biological categories. Most of probesets upregulated in Plerixafor mobilized cells were enriched in cellular organization and metabolic process (p value <0.05) **(A-B)**, while most of the probesets down regulated in Plx PB are involved in cell cycle process (p value <0.001) **(C-D)**. One-way ANOVA statistical analysis was performed. Enrichment score (ES) for each process is reported.

**A**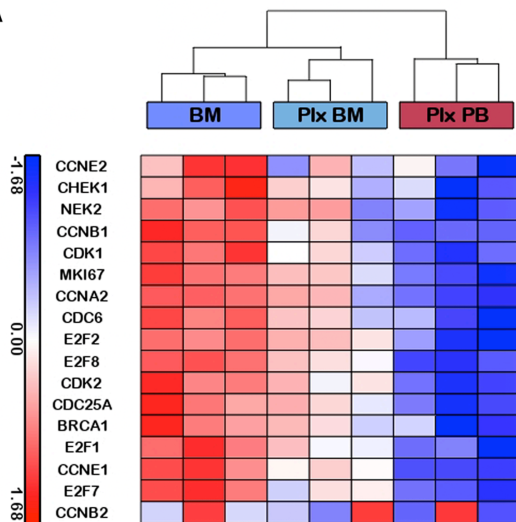**B**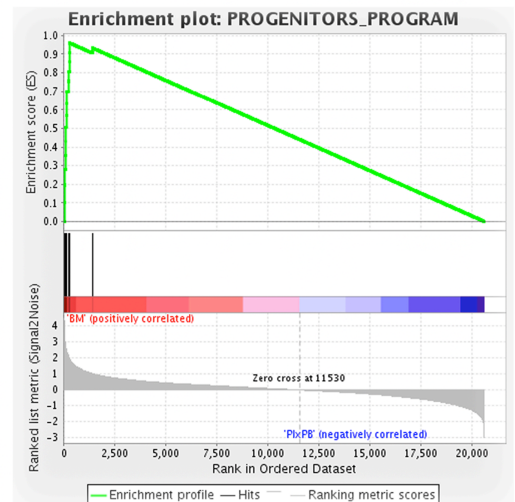

**Fig. S2. HSPCs from BM are transcriptionally enriched for genes associated with PROGENITORS\_PROGRAM.**

A. Heat map of regulators of cell cycle and DNA repair, showing core enriched in “Progenitor associated program” in BM expression profile. In this image, the normalized expression levels of genes are presented according to a colored gradient from the highest (red) to lowest (blue, see colored scale).

B. List of genes reported in panel (A) was used to create the gene set PROGENITOR\_PROGRAM. GSEA plot enrichment of PROGENITOR\_PROGRAM in BM (n=3) vs Plx PB (n=3) expression profile (p<0.01).

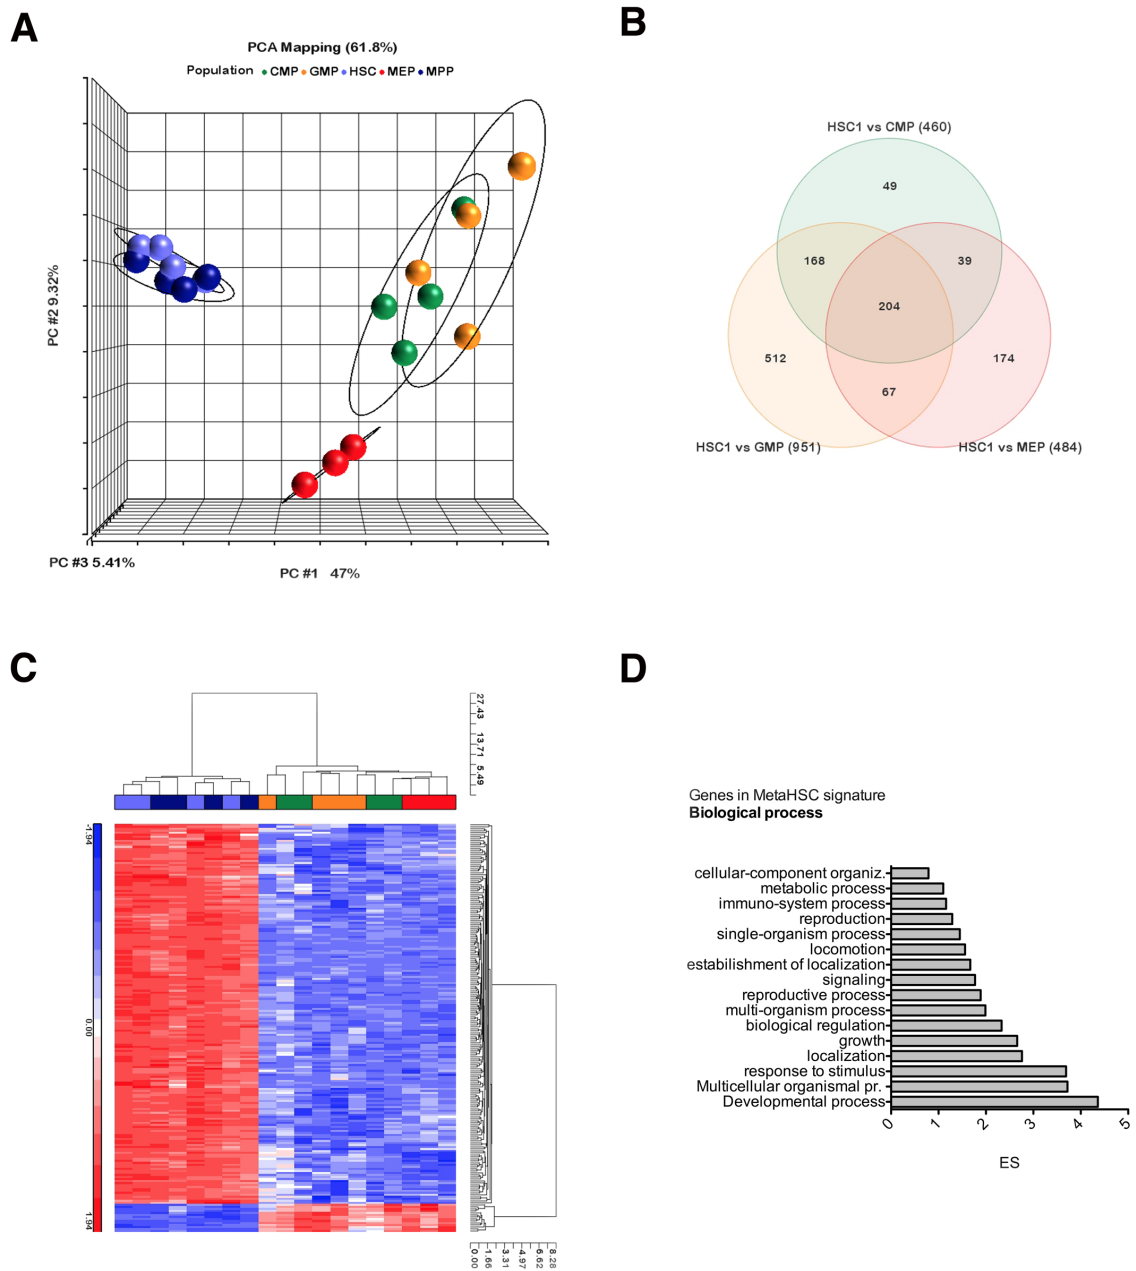

**Fig. S3 Meta-Analysis of gene expression data identifies a molecular signature characteristics for HSCs.** Results of the *in silico* identification of the molecular signature of HSCs. Meta-analysis on raw gene expression data available in Gene Expression Commons data base (<https://geqc.stanford.edu/population/>). CEL files were downloaded. The quality of the data sets was checked using a

series of QC metrics. Gene expression data were reannotated according to the Entrez genome annotation using CDF files. GC-RMA (robust multiarray averaging) normalization was applied. Differentially expressed genes were identified with Partek using a 10-fold change as a threshold, an adjusted FDR <0.001, and the “AND” operator to identify consistently upregulated or downregulated genes. **A.** Population –distance analysis of BM-derived HSPC subsets including HSCs, MPPs and oligopotent progenitors, i.e. CMP, GMP, MEP (n=3). **B.** Venn diagram illustrating the number of genes that show altered expression in HSC1 compared with CMP GMP, and MEP cells. We refer collectively to HSC and MMP as HSC1. Values indicate the number of genes significantly upregulated or downregulated. **C.** Heatmap of genes enriched in HSC and MPP populations than in those no detectable HSC in three different sorted bone marrow populations (CMP, GMP, MEP). In this image, the normalized expression levels of genes are presented according to a colored gradient from the highest (red) to lowest (blue, see colored scale). **D.** Gene Ontology analysis of genes from MetaHSc signature.

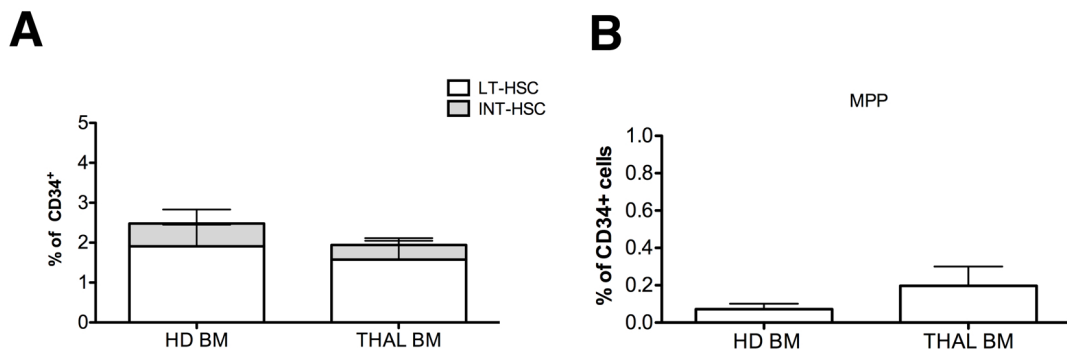

**Fig. S4 Comparison of immunophenotypic analyses from thalassemic (THAL) and healthy donor (HD) BM CD34<sup>+</sup> cells. A.** Analysis LT-HSC and INT-HSC frequency of HD BM ( $n = 9$ ) and THAL BM samples on CD34<sup>+</sup> cells ( $n = 3$ ). **B.** Immunophenotypic analysis of MPP in HD BM ( $n = 9$ ) and THAL BM samples on CD34<sup>+</sup> cells ( $n = 3$ ). Data are represented as mean $\pm$ SEM

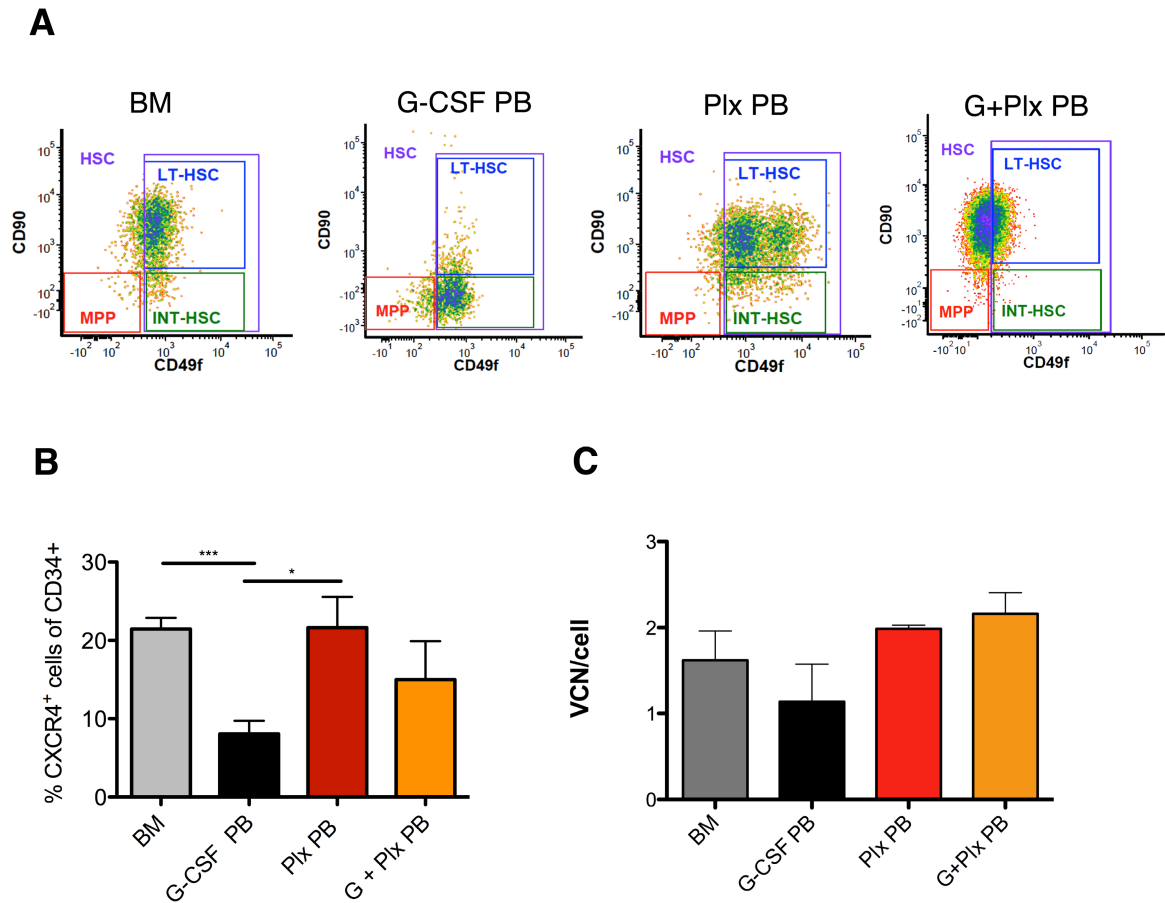

**Fig. S5. A.** Representative flow cytometry gated used to isolate the stem and progenitors populations. The expression of CD38, CD90, CD45RA and CD49f cell surface markers is considered the “gold standard” for predicting primitive HSCs<sup>20</sup>  
<sup>21</sup> Using these markers three main subpopulations of CD34<sup>+</sup> cells were identified: HSCs (CD34<sup>+</sup> CD38<sup>-/low</sup> CD90<sup>+/-</sup> CD45RA<sup>-</sup> CD49f<sup>+</sup>); LT-HSCs (CD34<sup>+</sup> CD38<sup>-/low</sup> CD90<sup>+</sup> CD45RA<sup>-</sup> CD49f<sup>+</sup>); MPPs (CD34<sup>+</sup> CD38<sup>-/low</sup> CD90<sup>-</sup> CD45RA<sup>-</sup> CD49f<sup>-</sup>).

**B.** Summary of CXCR4 cell surface marker expression on CD34<sup>+</sup> cells from BM (n=5), G-CSF (n=4), Plx (n=3) or G+Plx (n=2) mobilized cells. Percentage of CXCR4<sup>+</sup> was significant lower in G-CSF mobilized CD34<sup>+</sup> cells compared to BM and Plerixafor mobilized CD34<sup>+</sup> cells (\*\*p<0.001, \* p<0.05). Data are represented as mean±SEM.

**C.** Analysis of VCN in the bone marrow of mice transplanted with BM, G-CSF PB, Plx PB and G+Plx PB CD34<sup>+</sup> CD38<sup>-/low</sup> transduced by LV-PGK/Luc vector.

Data are represented as mean±SEM.

**Suppl. Table 1. Transcriptome of HSPCs.**

For each different stem cell sources, differential expression gene lists were generated, using Partek software, of transcripts > 2-fold differentially expressed ANOVA. Number of identified probesets, genes and p value are indicated for each contrast.

| Contrast         | p value  | n° probesets | n° genes | Fold change |
|------------------|----------|--------------|----------|-------------|
| BM vs Plx PB     | FDR 0.05 | 829          | 567      | >2          |
| BM vs Plx BM     | p<0.01   | 306          | 213      |             |
| Plx BM vs Plx PB | p<0.01   | 505          | 363      |             |



**Suppl Table 2 Selected genes under-expressed in Plx PB versus BM**

| Probeset ID  | Entrez Gene | Gene Symbol | Fold-Change | p-value     |
|--------------|-------------|-------------|-------------|-------------|
| 211851_x_at  | 672         | BRCA1       | -2.13671    | 0.000428339 |
| 204531_s_at  | 672         | BRCA1       | -3.29405    | 0.000531836 |
| 203418_at    | 890         | CCNA2       | -9.45447    | 3.22E-06    |
| 214710_s_at  | 891         | CCNB1       | -3.32846    | 1.91E-05    |
| 202705_at    | 9133        | CCNB2       | -7.15253    | 1.62E-06    |
| 213523_at    | 898         | CCNE1       | -2.38877    | 5.12E-05    |
| 211814_s_at  | 9134        | CCNE2       | -2.17766    | 0.00120547  |
| 1555772_a_at | 993         | CDC25A      | -6.68769    | 2.55E-06    |
| 204695_at    | 993         | CDC25A      | -3.29747    | 1.02E-05    |
| 203968_s_at  | 990         | CDC6        | -7.30528    | 9.78E-07    |
| 203967_at    | 990         | CDC6        | -7.0528     | 7.76E-06    |
| 203213_at    | 983         | CDK1        | -10.8246    | 3.71E-09    |
| 210559_s_at  | 983         | CDK1        | -4.54162    | 3.30E-07    |
| 203214_x_at  | 983         | CDK1        | -2.55404    | 7.70E-06    |
| 231534_at    | 983         | CDK1        | -6.02867    | 1.08E-05    |
| 211804_s_at  | 1017        | CDK2        | -2.12117    | 1.88E-06    |
| 205394_at    | 1111        | CHEK1       | -3.2863     | 7.06E-06    |
| 238075_at    | 1111        | CHEK1       | -9.77372    | 0.000215113 |
| 204947_at    | 1869        | E2F1        | -3.78991    | 2.70E-07    |
| 2028_s_at    | 1869        | E2F1        | -2.45467    | 2.17E-05    |
| 228361_at    | 1870        | E2F2        | -12.5314    | 2.98E-05    |
| 207042_at    | 1870        | E2F2        | -6.18138    | 0.000280652 |
| 228033_at    | 144455      | E2F7        | -10.5439    | 1.84E-06    |
| 241725_at    | 144455      | E2F7        | -2.34462    | 0.00102819  |
| 219990_at    | 79733       | E2F8        | -8.15568    | 3.17E-07    |
| 212023_s_at  | 4288        | MKI67       | -12.4961    | 8.91E-08    |
| 212022_s_at  | 4288        | MKI67       | -13.0685    | 3.17E-07    |
| 212020_s_at  | 4288        | MKI67       | -15.3332    | 2.96E-07    |
| 212021_s_at  | 4288        | MKI67       | -5.87754    | 9.29E-06    |
| 204641_at    | 4751        | NEK2        | -4.34153    | 9.86E-05    |
| 211080_s_at  | 4751        | NEK2        | -7.35375    | 2.67E-07    |

**Suppl Table 3. Genes over-expressed in Plx PB *versus* BM**

| <b>Probeset ID</b> | <b>Entrez Gene</b> | <b>Gene Symbol</b> | <b>Fold-Change</b> | <b>p-value</b> |
|--------------------|--------------------|--------------------|--------------------|----------------|
| 209993_at          | 5243               | ABCB1              | 2.76108            | 0.00122862     |
| 204753_s_at        | 3131               | HLF                | 3.54048            | 0.00589902     |
| 204754_at          | 3131               | HLF                | 3.0511             | 0.0157823      |
| 204755_x_at        | 3131               | HLF                | 4.83873            | 0.0127038      |
| 208557_at          | 3203               | HOXA6              | 2.17172            | 0.00022513     |
| 208414_s_at        | 3213               | HOXB3              | 2.17433            | 0.000206938    |
| 228904_at          | 3213               | HOXB3              | 2.05225            | 0.00419518     |
| 231049_at          | 4005               | LMO2               | 2.23371            | 0.000432283    |
| 204249_s_at        | 4005               | LMO2               | 2.01981            | 0.000972646    |
| 215851_at          | 2122               | MECOM              | 2.61226            | 0.00266186     |
| 1559477_s_at       | 4211               | MEIS1              | 2.46408            | 0.000928568    |
| 204069_at          | 4211               | MEIS1              | 2.58789            | 0.000509454    |
| 225221_at          | 7586               | ZKSCAN1            | 2.9368             | 0.000302157    |

**Suppl. Table 4. Gene expression comparison between HD and THAL BM**

| Differentially expressed genes<br>HD BM vs THAL BM |          |             |             |
|----------------------------------------------------|----------|-------------|-------------|
|                                                    | p value  | Nr of genes | Fold change |
| CD34 <sup>+</sup> sample                           | FDR 0.05 | 0           | >2          |

**Suppl. Table 5. SRCs frequency in HSPCs cell sources**

| CD34+Stem cell Source | Transplanted Cell dose | Engrafted Mice /transplanted mice | Stem Cell Frequency (95% Confidence Interval) |
|-----------------------|------------------------|-----------------------------------|-----------------------------------------------|
| Plx PB                | 2.5 x 10 <sup>4</sup>  | 0/4                               | <b>1/47875</b><br><b>(28222-79523)</b>        |
|                       | 5 x 10 <sup>4</sup>    | 4/4                               |                                               |
|                       | 1 x 10 <sup>5</sup>    | 12/14                             |                                               |
|                       | 2 x 10 <sup>5</sup>    | 4/4                               |                                               |
|                       | 3 x 10 <sup>5</sup>    | 16/16                             |                                               |
|                       | 5 x 10 <sup>5</sup>    | 13/13                             |                                               |
|                       | 7 x 10 <sup>5</sup>    | 11/11                             |                                               |
| G-CSF PB              | 1 x 10 <sup>5</sup>    | 1/5                               | <b>1/141203</b><br><b>(71330-279518)</b>      |
|                       | 3 x 10 <sup>5</sup>    | 5/5                               |                                               |
|                       | 5 x 10 <sup>5</sup>    | 5/5                               |                                               |
|                       | 7 x 10 <sup>5</sup>    | 5/5                               |                                               |
| G+Plx PB              | 2.5 x 10 <sup>4</sup>  | 0/5                               | <b>1/201803</b><br><b>(114990-354157)</b>     |
|                       | 5 x 10 <sup>4</sup>    | 0/10                              |                                               |
|                       | 1 x 10 <sup>5</sup>    | 4/11                              |                                               |
|                       | 3 x 10 <sup>5</sup>    | 8/8                               |                                               |
| BM                    | 5 x 10 <sup>4</sup>    | 1/4                               | <b>1/56020</b><br><b>(26945-116469)</b>       |
|                       | 1 x 10 <sup>5</sup>    | 4/4                               |                                               |
|                       | 2 x 10 <sup>5</sup>    | 5/5                               |                                               |
|                       | 3 x 10 <sup>5</sup>    | 4/4                               |                                               |

**Suppl. Table 6. Statistic analysis of SRCs frequency**

| Contrast          | P value |
|-------------------|---------|
| Plx PB BM         | 0.74    |
| Plx PB G-CSF      | 0.0185  |
| Plx PB G+Plx      | 0.00015 |
| G+Plx PB G-CSF PB | 0.454   |
| G+Plx PB BM       | 0.00855 |
| G-CSF PB BM       | 0.0884  |

## **METHODS**

### **Human subjects**

Four adult subjects affected by transfusion dependent beta-thalassemia were enrolled in a clinical protocol of CD34<sup>+</sup> cells mobilization (EudraCT 2011-000973-30) and treated with Plerixafor (Mozobil or AMD3100). All the patients signed informed consent and the experiments performed were approved by San Raffaele Scientific Institute Ethical Committee.

Two more thalassemic patients were treated with G-CSF and Plerixafor for the purpose of mobilization of peripheral blood stem cells as back-up prior to allogeneic stem cell transplantation and signed an informed consent for off label use of Plerixafor and for research use of biological material.

### **Peripheral blood stem cell mobilization protocols**

A clinical protocol exploring the use of Plerixafor as single agent (EudraCT 2011-000973-30) was conducted at San Raffaele Hospital in Milan, Italy. Four adult transfusion dependent beta-thalassemia patients were enrolled and treated with Plerixafor subcutaneously at the dose of 0.24 mg/kg at time 0. CD34<sup>+</sup> cell amount was monitored in the peripheral blood using cytofluorimetric analysis. If this was found to be less than 20 CD34<sup>+</sup> cells/  $\mu$ l (threshold used to predict poor mobilizer patients) no apheresis was done. On day +1, immunophenotype for CD34 expression was repeated and, unless  $> 5 \times 10^6$  CD34<sup>+</sup>/kg had been collected on day 0, a second dose of Plerixafor (0.40 mg/Kg) was administered and a second apheresis performed. No severe adverse events occurred.

Two adult transfusion dependent beta-thalassemia patients were subjected to CD34<sup>+</sup> cells mobilization with G-CSF and Plerixafor for the purpose of

transplantation back-up harvest. G-CSF was administered at a daily dose of 5-10 µg/kg sub-cutaneously, divided in 2 doses, for 2-3 days, followed by a single administration of Plerixafor at the dose of 0.24 mg/kg sub-cutaneously.

### **Isolation and immunophenotypic characterization of CD34<sup>+</sup> cells**

Healthy donors (HD) BM-derived and G-CSF mobilized CD34<sup>+</sup> cells were purchased from Lonza (Basel, Switzerland) and ALLCELLs (Alameda, CA, USA) respectively. The mobilized leukoapheretic products from patients were enriched for CD34<sup>+</sup> cells using CliniMACS (Miltenyi Biotec, Auburn, CA) according to the manufacturer's instructions.

Mononuclear cells from BM aspirates, Plerixafor alone or with G-CSF leukoapheretic products were isolated by Ficoll density separation. CD34<sup>+</sup> cells were selected using anti-CD34 microbeads (Miltenyi Biotec, Auburn, CA, USA). CD34<sup>+</sup> cells labelled with PECy7-coniugated antibody (clone 8G12) (Becton Dickinson, San Jose, CA, USA) were analyzed for the expression of other markers using the following antibodies: CD45RA (FITC, clone HI100), CD90 (APC, clone 5E10), CD49f (PE, clone GoH3), CD38 (PerCPCy5.5, clone HIT2) and CXCR4 (PE, clone 12G5) (BD Pharmingen, San Jose, CA, USA).

Subpopulation composition of the committed progenitors (CMP, GMP, MEP and CLP) were analyzed by the using following antibodies: CD34 (PECy7, clone 8G12) (Becton Dickinson, San Jose, CA, USA), CD45RA (FITC, clone HI100), CD38 (PerCPCy5.5, clone HIT2), CD45RA (FITC, clone HI100), CD10 (PE, clone HI10a) (Becton Dickinson, San Jose, CA, USA), CD7 (BV421, clone M-T701) (BD

Horizon, San Jose, CA, USA), CD135 (APC, clone BV10A4H2) BioLegend, San Diego, CA, USA).

To sort CD34<sup>+</sup> CD38<sup>-</sup> cells, CD34<sup>+</sup> cells were stained with PE-conjugated anti human CD34 (Becton Dickinson, San Jose, CA, USA) and APC-conjugated anti human CD38 (Becton Dickinson, San Jose, CA, USA).

Cells were acquired using a FACS Canto II (BD Biosciences, San Jose, CA, USA) and analysed with FCS Express Software (De Novo Software, Los Angeles, CA, USA).

### **Lentiviral Vector**

To generate the LV-PGK/Luc vector, Luciferase transgene was cloned into the *EcoRV-Sall* sites of the pCCLppt.PGK.GFP.WPRE-18 SIN-LV plasmid<sup>18</sup> VSV-G pseudotyped viral stocks were produced by transient transfection in 293-T cells, collected and concentrated as previously described<sup>19</sup>

### **Cell culture and transduction**

Following sorting, CD34<sup>+</sup> CD38<sup>-/low</sup> cells were seeded on non-tissue culture Retronectin coated plates (30 µg/ml, TaKaRa Bio, Shiga, Japan) at 1 × 10<sup>6</sup> cells/ml in serum-free CellGro SCGM Medium (Cell Genix Technologies, Friburg, Germany) in the presence of cells SCF (300 ng/ml), FLT3-L (300 ng/ml), Thrombopoietin (100 ng/ml), and IL-3 (60ng/ml) (all from Peprotech, Rocky Hill, NY). Following 4h of prestimulation, cells were transduced with LV-PGK/Luc at multiplicity of infection (MOI) 100 o/n. At the end of transduction, cells were transplanted in sublethally irradiated NSG mice.

### **Xenotransplantation assay**

NOD/ShiLtSz-*scid*/IL2R $\gamma$ <sup>null</sup> (NSG) mice (Jackson Laboratory) were maintained in a specific pathogen-free animal facility. Procedures were performed according to protocols approved by the Committee for Animal Care and Use of San Raffaele Scientific Institute (Committee Protocol no. 375). 9-10 wks old female NSG mice were sublethally irradiated and i.v. injected with CD34<sup>+</sup> cells in a volume of 200  $\mu$ l phosphate-buffered saline.

Transplanted mice were sacrificed 3-4 months after transplant. Mice were analyzed for the presence of human CD45<sup>+</sup> cells (clone HI30, BD Pharmingen, San Jose, CA, USA). The bone marrow and peripheral blood were analyzed for human cell engraftment.

### ***In vivo* homing assay**

9-10 wks old NSG mice were sublethally irradiated and 3 x 10<sup>4</sup> LV-PGK/Luc transduced CD34<sup>+</sup> CD38<sup>-</sup> cells were intravenously injected along with 2 x 10<sup>5</sup> not transduced CD34<sup>+</sup> CD38<sup>+</sup> cells, in order to avoid trapping of primitive cells in filter organs.

24 hrs after injection mice were analyzed at IVIS instrument SpectrumCT System (Perkin Elmer). Four different cohorts of mice were generated by transplantation of BM (CD34<sup>+</sup> cells from 5 donors), G-CSF PB (3 donors), Plx PB (3 donors) and G+Plx PB (2 donors)

### ***In vivo* bioluminescence imaging**



*In vivo* bioluminescence imaging (BLI) was performed by using the IVIS SpectrumCT System (Perkin Elmer). This system is equipped with a back-thinned, back-illuminated CCD camera cooled at -90°C with a quantum efficiency in the visible range above 85%.

Each animal received an intra-peritoneal injection of 150 mg luciferin/kg body weight 10 minutes before performing BLI. During BLI acquisition, the animals were kept at 37°C and under gaseous anesthesia (2–3% isoflurane and 1 l/min oxygen). A set of images was acquired every 2 minutes from 10 to 20 minutes after luciferin injection in order to detect the highest BLI signal. The images were obtained using the following settings: exposure time=auto, binning=8, f=1 and a field of view equal to 13 cm (field C). Dark images were acquired before and then subtracted to bioluminescence images, no emission filters were used during BLI acquisitions.

### **BLI image analysis**

BLI image analysis was performed by placing region of interests (ROI) over the legs of the animals as shown in figure. The total flux (photons/seconds) was measured in order to quantify light emission in each ROI.

Images were acquired and analyzed using the Living Image 4.5 software (Perkin Elmer).

### **Microarray and Bioinformatic Analysis.**

The quality of total RNA was first assessed using an Agilent Bioanalyzer 2100 (Agilent Technologies, Palo Alto, CA).

Bioin-labeled cDNA targets were synthesized starting from 5-30 ng of total RNA.

Double stranded cDNA synthesis and related cRNA was performed with Ovation®

Pico WTA Systems V2 (NuGEN Technologies, Inc). With the Encore® Biotin Module (NuGEN Technologies, Inc) was synthesized the fragmented and labeled cDNA. All steps of the labeling protocol were performed according to the manufacturer's recommended protocols.

Hybridization was performed using the Affymetrix GeneChip® Hybridization, Wash and Stain Kit, according to the Encore® Biotin Module (NuGEN Technologies, Inc) recommended protocol for Affymetrix GeneChip® Human Genome U133 Plus 2.0 Arrays.

It contains mix for target dilution, DMSO at a final concentration of 10% and pre-mixed biotin-labeled control oligo B2 and bioB, bioC, bioD and cre controls (Affymetrix cat# 900299) at a final concentration of 50 pM, 1.5 pM, 5 pM, 25 pM and 100 pM respectively. Targets were diluted in hybridization buffer at a concentration of 23 ng/ul, denatured at 99 °C for 2 minutes, incubated at 45 °C for 5 minutes and centrifuged at maximum speed for 1 minute prior to introduction into the GeneChip cartridge. A single [GeneChip®](#) Human Genome U133 Plus 2.0 was then hybridized with each biotin-labeled target.

Hybridizations were performed for 18 hours at 45°C in a rotisserie oven. GeneChip® cartridges were washed and stained in the Affymetrix Fluidics Station 450 following the FS450\_0004 standard protocol, including the following steps: (1) (wash) 10 cycles of 2 mixes/cycle with Wash Buffer A at 25 °C; (2) (wash) 4 cycles of 15 mixes/cycle with Wash Buffer B at 50 °C; (3) stain of the probe array for 10 min in SAPE solution at 25 °C; (4) (wash) 10 cycles of 4 mixes/cycle with Wash Buffer A at 30 °C; (5) stain of the probe array for 10 min in antibody solution at 25 °C; (6) stain of the probe array for 10 min in SAPE solution at 25 °C; (7) (final

wash) 15 cycles of 4 mixes/cycle with Wash Buffer A at 30 °C; (8) fill the probe array with Array Holding buffer.

GeneChip arrays were scanned using an Affymetrix GeneChip® Scanner3000 7G using default parameters. Affymetrix GeneChip® Command Console software (AGCC) was used to acquire GeneChip® images and generate .DAT and .CEL files, which were used for subsequent analysis with proprietary software.

Partek Genomics Suite v 6.4 was used for analysis of microarray data.

### **Statistics**

Comparison of two means was performed by unpaired Student's *t* test and one way-anova.

For microarray analysis ANOVA was applied considering unjusted p value or FDR, as reported in the figure legends.

### **STUDY APPROVAL**

All the patients signed informed consent and the experiments performed were approved by San Raffaele Scientific Institute Ethical Committee. Animals procedures were performed according to protocols approved by the Committee for Animal Care and Use of San Raffaele Scientific Institute (Committee Protocol no. 375).
