# Supplementary material
Source: PubMed Central journal article supplement (PMC5395121)
Supplement: 2016_154740-Disclosures_and_Contributions.pdf [file 2016_154740-Disclosures_and_Contributions.pdf]

Haematologica  
HAEMATOL/2016/154740  
Version 4

Plerixafor and G-CSF combination mobilizes hematopoietic stem and progenitors cells with a distinct transcriptional profile and a reduced in vivo homing capacity compared to Plerixafor alone

Maria Rosa Lidonnici, Annamaria Aprile, Marta Claudia Frittoli, Giacomo Mandelli, Ylenia Paleari, Antonello Spinelli, Bernhard Gentner, Matilde Zambelli, Cristina Parisi, Laura Bellio, Elena Cassinerio, Laura Zanaboni, Maria Domenica Cappellini, Fabio Ciceri, Sarah Markt, and Giuliana Ferrari

Disclosures: none

Contributions: M.R.L. and A.A. designed the experimental work, performed research, analyzed data and co-wrote the paper; G.M. performed research; Y.P. contributed to bioinformatic analysis; A.S. performed in vivo bioluminescence imaging; M.F. wrote the clinical protocol and contributed to patients clinical management; S.M., F.C. and M.D.C. participated as PIs of the clinical study (EudraCT 2011-000973-30), wrote the clinical protocol and contributed to patients clinical management; M.Z. and C.P. performed CD34+ immunoselection from apheresis; B.G. contributed to patients clinical management; L.B., E.C., L.Z. participated as clinical collaborators of the clinical study; G.F. participated as co-investigator of the clinical study, designed and support research, analyzed data, wrote and critically reviewed the paper. All Authors approved the final version of the manuscript.
